# Supplementary material for: Genetic loci of beta-aminoisobutyric acid are associated with aging-related mild cognitive impairment
Source: PubMed Central journal article supplement (PMC10148805; doi:10.1038/s41398-023-02437-y), 2023-04-29
Supplement: 41398_2023_2437_MOESM1_ESM.pdf [file 41398_2023_2437_MOESM1_ESM.pdf]

# Genetic loci of beta-aminoisobutyric acid are associated with aging-related Mild Cognitive Impairment: Supplementary Materials

Einat Granot-HersHKovitz, Brian Spitzer, Yunju Yang, Wassim Tarraf, Bing Yu, Eric Boerwinkle,  
Myriam Fornage, Thomas H. Mosley, Charles DeCarli, Bruce Kristal, Hector M Gonzalez,  
Tamar Sofer

|                                                                                                                                                                                                             |    |
|-------------------------------------------------------------------------------------------------------------------------------------------------------------------------------------------------------------|----|
| Supplementary Note 1: ARIC Methods .....                                                                                                                                                                    | 2  |
| Supplementary Note 2: Lifestyle characteristics included in the association analysis with MRS-<br>MCI and BAIBA .....                                                                                       | 3  |
| Supplementary Tables .....                                                                                                                                                                                  | 4  |
| Supplementary Table 1: MRS metabolites and weights .....                                                                                                                                                    | 4  |
| Supplementary Table 2: LD between <i>AGXT2</i> region MRS SNPs and BAIBA SNPs .....                                                                                                                         | 6  |
| Supplementary Table 3: Association of MCI-MRS associated SNPs with MCI-MRS metabolites .....                                                                                                                | 7  |
| Supplementary Table 4: Association of the significant GWAS loci identified in HCHS/SOL set B<br>with MCI in HCHS/SOL replication samples .....                                                              | 9  |
| Supplementary Table 5: Estimated associations of wGRS with MCI in HCHS/SOL set B .....                                                                                                                      | 10 |
| Supplementary Table 6: Demographics, health, and lifestyle characteristics of the ARIC study<br>population datasets .....                                                                                   | 11 |
| Supplementary Table 7: Associations of the variants that were associated with MCI-MRS and<br>BAIBA in HCHS/SOL set B with MCI in ARIC, stratified by <i>APOE-ε4</i> carrier status .....                    | 12 |
| Supplementary Table 8: Replication meta-analysis results for the genetic variants detected as<br>associated with MCI-MRS and BAIBA in HCHS/SOL set B, stratified by <i>APOE-ε4</i> carrier status.<br>..... | 13 |
| Supplementary Table 9: Association between lifestyle characteristics and MRS for MCI or<br>BAIBA in HCHS/SOL (n=3978) .....                                                                                 | 14 |
| Supplementary Figures .....                                                                                                                                                                                 | 15 |
| Supplementary Figure 1: QQ-plots of GWAS for MCI-MRS and BAIBA in HCHS/SOL (n=3,862).<br>.....                                                                                                              | 15 |
| Supplementary Figure 2: Locus zoom plot for the top locus, chr5p13.2, associated with BAIBA<br>in n=3,862 HCHS/SOL participants. ....                                                                       | 16 |
| Supplementary References .....                                                                                                                                                                              | 17 |

## Supplementary Note 1: ARIC Methods

The Atherosclerosis Risk in Communities (ARIC) study is a prospective longitudinal study of the development of atherosclerosis, and its clinical sequelae in which 15,792 individuals aged 45-64 years from four communities in the United States were enrolled at the baseline examination (1987-1989). A detailed description of the ARIC study has been reported previously<sup>1</sup>. Various medical information and specimens were collected at each of the eight examinations. Written informed consent was provided by all study participants, and the study design and methods were approved by the institutional review boards at each of the collaborating medical institutions: University of Mississippi Medical Center Institutional Review Board (Jackson Field Center); Wake Forest University Health Sciences Institutional Review Board (Forsyth County Field Center); University of Minnesota Institutional Review Board (Minnesota Field Center); and Johns Hopkins University School of Public Health Institutional Review Board (Washington County Field Center). In this analysis, we use 3,775 European American and 1,032 African American ARIC participants with Mild Cognitive Impairment (MCI) status determined based on data from ARIC visit 5. Detailed descriptions of participants' health, demographic, and lifestyle characteristics are presented below.

The protocol for MCI and dementia diagnosis in ARIC has been previously described in detail<sup>2</sup>. At visit 5, all participants were identified as cognitively normal or possible MCI/dementia cases with the use of an algorithm that considered MMSE scores, Clinical Dementia Rating sum of boxes, concurrent performance on the neuropsychological test battery, and change in cognitive function from previous assessments. All cases that were identified as possible MCI/dementia by this algorithm and a sample of cognitively normal participants were reviewed by 2 experts (a physician and a neuropsychologist), who classified participants' cognitive status as normal, MCI, or dementia, with discordant diagnoses adjudicated by a third reviewer.

## Supplementary Note 2: Lifestyle characteristics included in the association analysis with MRS-MCI and BAIBA

Depression (10-item Center for Epidemiologic Studies Depression Scale (CES-D) summary score), education (three levels: <12 yrs, 12 yrs, >12 yrs), physical activity (Total physical activity (min/day)), sleep duration (Average sleep duration (hours)), insomnia (8 Women's Health Initiative Insomnia Rating Scale), respiratory event index (Apnea/Hypopnea Index (3% desat)), BMI (kg/m<sup>2</sup>), smoking (three levels: Never, Former, Current), alcohol consumption (three levels: Never, Former, Current), Mediterranean diet score. The Mediterranean dietary score is derived from the mean intakes of food groups/nutrients from two 24-hour dietary recalls, ranging between 0 (lowest adherence to the diet) and 9 (highest adherence to the diet) <sup>3</sup>.

## Supplementary Tables

Supplementary Table 1: MRS metabolites and weights

| Biochemical name                                               | HMDB ID   | Weight | % missing |
|----------------------------------------------------------------|-----------|--------|-----------|
| Adenosine                                                      | HMDB00050 | -0.067 | 4.32%     |
| Alpha-ketobutyrate                                             | HMDB00005 | 0.132  | 21.09%    |
| 2-aminoadipate                                                 | HMDB00510 | 0.076  | 0.53%     |
| 3-aminoisobutyrate                                             | HMDB03911 | -0.112 | 0.23%     |
| 2-aminooctanoate                                               | HMDB00991 | -0.025 | 10.46%    |
| Betaine                                                        | HMDB00043 | -0.029 | 0.05%     |
| Carotene diol (1)                                              |           | 0.043  | 0.20%     |
| Carotene diol (2)                                              |           | 0.040  | 16.09%    |
| Cerotoylcarnitine (C26)*                                       | HMDB06347 | 0.064  | 11.97%    |
| Cysteine-glutathione disulfide                                 | HMDB00656 | -0.024 | 0.55%     |
| 12,13-DiHOME                                                   | HMDB04705 | -0.131 | 16.57%    |
| 1-dihomo-linolenylglycerol (20:3)                              |           | 0.039  | 2.46%     |
| 2,3-dihydroxy-2-methylbutyrate                                 | HMDB29576 | 0.030  | 7.79%     |
| 1,2-dilinoleoyl-GPC (18:2/18:2)                                | HMDB08138 | -0.081 | 0.08%     |
| Dimethylarginine (SDMA + ADMA)                                 | HMDB01539 | -0.024 | 0.10%     |
| Dimethylglycine                                                | HMDB00092 | -0.087 | 0.10%     |
| Docosadioate                                                   |           | -0.017 | 1.76%     |
| Eicosanodioate                                                 |           | -0.129 | 0.10%     |
| Gamma-glutamylhistidine                                        |           | -0.123 | 0.10%     |
| Glutamate, gamma-methyl ester                                  | HMDB61715 | -0.051 | 0.80%     |
| Glutaryl carnitine (C5-DC)                                     | HMDB13130 | -0.100 | 0.13%     |
| Glycochenodeoxycholate sulfate                                 |           | 0.223  | 4.78%     |
| Glycodeoxycholate                                              | HMDB00631 | 0.048  | 21.04%    |
| Glycosyl ceramide (d18:1/20:0, d16:1/22:0)*                    |           | -0.044 | 5.15%     |
| Glycosyl-N-(2-hydroxynervonoyl)-sphingosine (d18:1/24:1(2OH))* |           | 0.009  | 19.13%    |
| Guanidinoacetate                                               | HMDB00128 | 0.148  | 0.15%     |
| Hexadecanedioate                                               | HMDB00672 | 0.064  | 0.25%     |
| 2-hydroxyoctanoate                                             | HMDB02264 | -0.024 | 2.49%     |
| 3-hydroxypyridine sulfate                                      |           | 0.024  | 2.01%     |
| Hyocholeate                                                    | HMDB00760 | -0.050 | 11.84%    |
| Isobutyrylglycine                                              | HMDB00730 | 0.094  | 15.96%    |
| Lactosyl-N-palmitoyl-sphingosine (d18:1/16:0)                  |           | -0.059 | 0.10%     |

|                                                                 |           |        |        |
|-----------------------------------------------------------------|-----------|--------|--------|
| Linoleoyl-linoleoyl-glycerol (18:2/18:2) [1]*                   | HMDB07248 | -0.058 | 1.99%  |
| Maleate                                                         | HMDB00176 | 0.036  | 1.48%  |
| Methionine                                                      | HMDB00696 | -0.023 | 0.00%  |
| N('1)-acetylspermidine                                          | HMDB01276 | -0.010 | 0.43%  |
| N1-methylinosine                                                | HMDB02721 | -0.011 | 0.83%  |
| N6,N6,N6-trimethyllysine                                        | HMDB01325 | -0.064 | 0.10%  |
| N6-succinyladenosine                                            | HMDB00912 | 0.075  | 12.92% |
| N-acetylglucosaminylasparagine                                  | HMDB00489 | -0.062 | 11.54% |
| N-trimethyl 5-aminovalerate                                     |           | 0.070  | 0.10%  |
| Oleoyl ethanolamide                                             | HMDB02088 | 0.020  | 0.60%  |
| 1-oleoyl-GPE (18:1)                                             | HMDB11506 | 0.061  | 0.18%  |
| 2'-O-methyluridine                                              |           | 0.130  | 3.47%  |
| Orotate                                                         | HMDB00226 | -0.035 | 0.18%  |
| 5-oxoproline                                                    | HMDB00267 | -0.014 | 0.00%  |
| 1-palmitoleoyl-GPC (16:1)*                                      | HMDB10383 | 0.035  | 0.10%  |
| Phenylacetylcarnitine                                           |           | 0.050  | 2.84%  |
| Phenylalanylglycine                                             | HMDB28995 | -0.017 | 21.27% |
| Picolinate                                                      | HMDB02243 | 0.039  | 5.88%  |
| Pimeloylcarnitine/3-methyladipoylcarnitine (C7-DC)              |           | -0.026 | 13.10% |
| Pyroglutamine*                                                  |           | -0.001 | 0.10%  |
| Quinolate                                                       | HMDB00232 | -0.189 | 0.10%  |
| Sphingomyelin (d18:1/25:0, d19:0/24:1, d20:1/23:0, d19:1/24:0)* |           | -0.117 | 1.99%  |
| Stachydrine                                                     | HMDB04827 | 0.033  | 0.10%  |
| 1-stearoyl-2-oleoyl-GPS (18:0/18:1)                             | HMDB10163 | 0.146  | 24.26% |
| Suberate (octanedioate)                                         | HMDB00893 | 0.082  | 15.74% |
| Taurolithocholate 3-sulfate                                     | HMDB02580 | 0.003  | 4.93%  |
| Trigonelline (N'-methylnicotinate)                              | HMDB00875 | 0.033  | 0.10%  |
| Tryptophan betaine                                              | HMDB61115 | -0.141 | 0.35%  |
| Ursodeoxycholate                                                | HMDB00946 | -0.141 | 11.97% |

Abbreviations: *MRS* Metabolite risk score, *HMDB* Human Metabolome Database.

\*Metabolite compounds that have not been officially confirmed based on a standard, but Metabolon Inc. is confident in their identities.

Supplementary Table 2: LD between AGXT2 region MRS SNPs and BAIBA SNPs

| SNP                      | Chr | Position | Effect allele | Non effect allele | R <sup>2</sup> |
|--------------------------|-----|----------|---------------|-------------------|----------------|
| LD with MRS SNP rs37371  |     |          |               |                   |                |
| rs16899972               | 5   | 34998673 | A             | C                 | 0.00           |
| rs183958240              | 5   | 35002671 | G             | A                 | 0.00           |
| rs13174311               | 5   | 35032240 | T             | C                 | 0.05           |
| rs180749                 | 5   | 35033500 | A             | G                 | 0.01           |
| rs37369                  | 5   | 35037010 | T             | C                 | 0.30           |
| rs140156063              | 5   | 35037031 | A             | G                 | 0.00           |
| rs37370                  | 5   | 35039381 | T             | C                 | 1.00           |
| LD with MRS SNP rs344515 |     |          |               |                   |                |
| rs16899972               | 5   | 34998673 | A             | C                 | 0.07           |
| rs183958240              | 5   | 35002671 | G             | A                 | 0.02           |
| rs13174311               | 5   | 35032240 | T             | C                 | 0.64           |
| rs180749                 | 5   | 35033500 | A             | G                 | 0.13           |
| rs37369                  | 5   | 35037010 | T             | C                 | 0.02           |
| rs140156063              | 5   | 35037031 | A             | G                 | 0.01           |
| rs37370                  | 5   | 35039381 | T             | C                 | 0.08           |

rs37371 is on chromosome 5, position 35040125, effect allele G, other (non-effect) allele is A.  
rs344515 is on chromosome 5, position 35025665, effect allele A, other allele (non-effect) is G.  
Coordinates are provided in GRCh38i assembly.

Supplementary Table 3: Association of MCI-MRS associated SNPs with MCI-MRS metabolites

| Metabolite                                                     | sample size | rs344515   |             | rs37371    |             |
|----------------------------------------------------------------|-------------|------------|-------------|------------|-------------|
|                                                                |             | Effect est | p-value     | Effect est | p-value     |
| Adenosine                                                      | 3697        | -0.032     | 0.192       | 0.052      | 0.066       |
| Alpha-ketobutyrate                                             | 3043        | 0.010      | 0.730       | -0.020     | 0.530       |
| 2-aminoadipate                                                 | 3842        | 0.013      | 0.566       | -0.004     | 0.882       |
| 3-aminoisobutyrate                                             | 3854        | 0.595      | 1.25E-131** | -0.899     | 1.10E-211** |
| 2-aminooctanoate                                               | 3461        | 0.011      | 0.662       | 0.065      | 0.024*      |
| Betaine                                                        | 3860        | 0.000      | 0.990       | -0.003     | 0.917       |
| Carotene diol (1)                                              | 3855        | 0.005      | 0.815       | 0.024      | 0.365       |
| Carotene diol (2)                                              | 3242        | -0.002     | 0.927       | -0.009     | 0.768       |
| Cerotoylcarnitine (C26)*                                       | 3409        | -0.039     | 0.116       | -0.005     | 0.872       |
| Cysteine-glutathione disulfide                                 | 3842        | -0.016     | 0.506       | 0.017      | 0.537       |
| 12,13-DiHOME                                                   | 3225        | 0.008      | 0.777       | 0.000      | 0.995       |
| 1-dihomo-linolenylglycerol (20:3)                              | 3766        | -0.049     | 0.046       | 0.004      | 0.896       |
| 2,3-dihydroxy-2-methylbutyrate                                 | 3557        | -0.018     | 0.451       | 0.011      | 0.692       |
| 1,2-dilinoeoyl-GPC (18:2/18:2)                                 | 3859        | -0.035     | 0.135       | 0.001      | 0.957       |
| Dimethylarginine (SDMA + ADMA)                                 | 3859        | 0.124      | 3.75E-08**  | -0.265     | 1.06E-23**  |
| Dimethylglycine                                                | 3859        | 0.017      | 0.477       | -0.025     | 0.373       |
| Docosadioate                                                   | 3795        | 0.030      | 0.218       | 0.015      | 0.601       |
| Eicosanodioate                                                 | 3859        | 0.011      | 0.621       | 0.015      | 0.562       |
| Gamma-glutamylhistidine                                        | 3859        | -0.007     | 0.751       | 0.007      | 0.787       |
| Glutamate, gamma-methyl ester                                  | 3832        | -0.006     | 0.797       | -0.009     | 0.734       |
| Glutaryl carnitine (C5-DC)                                     | 3858        | 0.009      | 0.710       | -0.022     | 0.404       |
| Glycochenodeoxycholate sulfate                                 | 3680        | 0.054      | 0.031*      | -0.002     | 0.952       |
| Glycodeoxycholate                                              | 3050        | 0.043      | 0.111       | -0.009     | 0.768       |
| Glycosyl ceramide (d18:1/20:0, d16:1/22:0)*                    | 3670        | -0.002     | 0.928       | -0.021     | 0.465       |
| Glycosyl-N-(2-hydroxynervonoyl)-sphingosine (d18:1/24:1(2OH))* | 3134        | -0.058     | 0.021*      | 0.029      | 0.315       |
| Guanidinoacetate                                               | 3857        | -0.022     | 0.292       | 0.047      | 0.055       |
| Hexadecanedioate                                               | 3853        | -0.037     | 0.130       | 0.016      | 0.564       |
| 2-hydroxyoctanoate                                             | 3766        | 0.024      | 0.324       | 0.000      | 0.989       |
| 3-hydroxypyridine sulfate                                      | 3787        | -0.003     | 0.879       | -0.043     | 0.108       |
| Hyocholeate                                                    | 3405        | 0.032      | 0.223       | 0.028      | 0.347       |
| Isobutyrylglycine                                              | 3249        | 0.027      | 0.327       | -0.040     | 0.201       |
| Lactosyl-N-palmitoyl-sphingosine (d18:1/16:0)                  | 3859        | -0.017     | 0.480       | 0.024      | 0.403       |
| Linoleoyl-linoleoyl-glycerol (18:2/18:2) [1]*                  | 3789        | -0.044     | 0.074       | 0.023      | 0.432       |
| Maleate                                                        | 3804        | 0.003      | 0.894       | 0.029      | 0.297       |
| Methionine                                                     | 3862        | -0.005     | 0.810       | -0.036     | 0.169       |

|                                                                 |      |        |        |        |        |
|-----------------------------------------------------------------|------|--------|--------|--------|--------|
| N('1)-acetylspermidine                                          | 3846 | 0.033  | 0.178  | -0.026 | 0.351  |
| N1-methylinosine                                                | 3832 | -0.009 | 0.683  | -0.013 | 0.633  |
| N6,N6,N6-trimethyllysine                                        | 3859 | 0.057  | 0.014* | 0.008  | 0.765  |
| N6-succinyladenosine                                            | 3358 | 0.010  | 0.697  | 0.028  | 0.327  |
| N-acetylglucosaminylasparagine                                  | 3419 | 0.017  | 0.476  | -0.015 | 0.592  |
| N-trimethyl 5-aminovalerate                                     | 3859 | -0.026 | 0.267  | -0.043 | 0.109  |
| Oleoyl ethanolamide                                             | 3839 | -0.024 | 0.324  | 0.003  | 0.904  |
| 1-oleoyl-GPE (18:1)                                             | 3856 | -0.031 | 0.192  | 0.041  | 0.131  |
| 2'-O-methyluridine                                              | 3732 | 0.006  | 0.807  | 0.004  | 0.893  |
| Orotate                                                         | 3856 | 0.008  | 0.734  | 0.029  | 0.316  |
| 5-oxoproline                                                    | 3862 | -0.009 | 0.717  | 0.012  | 0.674  |
| 1-palmitoleoyl-GPC (16:1)*                                      | 3859 | -0.044 | 0.064  | 0.015  | 0.586  |
| Phenylacetylcarnitine                                           | 3755 | -0.030 | 0.226  | -0.046 | 0.110  |
| Phenylalanylglycine                                             | 3038 | 0.017  | 0.553  | 0.042  | 0.184  |
| Picolinate                                                      | 3636 | 0.030  | 0.216  | -0.012 | 0.675  |
| Pimeloylcarnitine/3-methyladipoylcarnitine (C7-DC)              | 3354 | 0.025  | 0.330  | 0.025  | 0.409  |
| Pyroglutamine*                                                  | 3859 | 0.034  | 0.113  | -0.022 | 0.388  |
| Quinolate                                                       | 3859 | 0.079  | 0.001* | -0.058 | 0.043* |
| Sphingomyelin (d18:1/25:0, d19:0/24:1, d20:1/23:0, d19:1/24:0)* | 3786 | -0.025 | 0.314  | 0.006  | 0.821  |
| Stachydrine                                                     | 3858 | 0.001  | 0.978  | 0.014  | 0.608  |
| 1-stearoyl-2-oleoyl-GPS (18:0/18:1)                             | 2934 | -0.042 | 0.134  | 0.004  | 0.902  |
| Suberate (octanedioate)                                         | 3251 | -0.026 | 0.302  | -0.005 | 0.866  |
| Taurolithocholate 3-sulfate                                     | 3670 | 0.016  | 0.516  | -0.001 | 0.973  |
| Trigonelline (N'-methylnicotinate)                              | 3859 | -0.009 | 0.684  | 0.019  | 0.464  |
| Tryptophan betaine                                              | 3850 | 0.027  | 0.265  | -0.005 | 0.854  |
| Ursodeoxycholate                                                | 3401 | -0.016 | 0.535  | 0.009  | 0.775  |

We estimated the association of each of the two MCI-MRS AGXT2 SNPs with each of the metabolites composing the MCI-MRS in linear mixed models using complete (not imputed) metabolites. Models were adjusted for age, sex, study center, 5 PCs of genetic data, and genetic analysis group, and random effects accounted for genetic relatedness, household sharing, and block unit sharing. P-values are from the 1-degrees of freedom score test. Analyses were performed using the GENESIS R package.



Supplementary Table 4: Association of the significant GWAS loci identified in HCHS/SOL set B with MCI in HCHS/SOL replication samples.

| Previous GWAS Outcome | Variant     | Chromosome | Position (hg38) | Eff. allele | Non eff. allele | Sample set C      |          |                                  |          |                            |          |                   |          | Sample set D      |          |
|-----------------------|-------------|------------|-----------------|-------------|-----------------|-------------------|----------|----------------------------------|----------|----------------------------|----------|-------------------|----------|-------------------|----------|
|                       |             |            |                 |             |                 | Model 1           |          |                                  |          |                            |          | Model 2           |          | Model 1           |          |
|                       |             |            |                 |             |                 | Total (n = 3,149) |          | APOE-ε4 non-carriers (n = 2,169) |          | APOE-ε4 carriers (n = 635) |          | Total (n = 2,804) |          | Total (n = 2,733) |          |
| Beta                  | p-value     | Beta       | p-value         | Beta        | p-value         | Beta              | p-value  | Beta                             | p-value  | Beta                       | p-value  |                   |          |                   |          |
| MRS                   | rs37371     | 5          | 35040125        | G           | A               | 0.148             | 1.66E-01 | 0.281                            | 3.60E-02 | -0.148                     | 5.49E-01 | 0.170             | 1.43E-01 | 0.162             | 1.56E-01 |
|                       | rs344515    | 5          | 35025665        | A           | G               | 0.057             | 5.33E-01 | 0.030                            | 7.92E-01 | 0.237                      | 2.59E-01 | 0.071             | 4.70E-01 | 0.052             | 5.95E-01 |
| BAIBA                 | rs16899972  | 5          | 34998673        | A           | C               | 0.184             | 2.90E-02 | 0.108                            | 2.96E-01 | 0.472                      | 1.26E-02 | 0.197             | 2.81E-02 | 0.204             | 2.32E-02 |
|                       | rs183958240 | 5          | 35002671        | G           | A               | 0.202             | 6.50E-01 | 0.173                            | 7.70E-01 | 0.338                      | 7.94E-01 | 0.238             | 6.58E-01 | 0.412             | 3.84E-01 |
|                       | rs13174311  | 5          | 35032240        | T           | C               | -0.231            | 2.51E-02 | -0.246                           | 5.11E-02 | -0.357                     | 1.21E-01 | -0.264            | 1.56E-02 | -0.210            | 5.77E-02 |
|                       | rs180749    | 5          | 35033500        | A           | G               | -0.293            | 1.27E-01 | -0.405                           | 8.90E-02 | -0.264                     | 5.61E-01 | -0.378            | 7.02E-02 | -0.271            | 1.84E-01 |
|                       | rs37369     | 5          | 35037010        | T           | C               | 0.144             | 1.38E-01 | 0.090                            | 4.55E-01 | 0.169                      | 4.43E-01 | 0.121             | 2.46E-01 | 0.101             | 3.32E-01 |
|                       | rs140156063 | 5          | 35037031        | A           | G               | 1.722             | 4.32E-03 | 2.020                            | 5.71E-03 | 1.411                      | 2.25E-01 | 1.897             | 2.19E-03 | 1.487             | 2.55E-02 |
|                       | rs37370     | 5          | 35039381        | T           | C               | 0.150             | 1.61E-01 | 0.282                            | 3.45E-02 | -0.146                     | 5.54E-01 | 0.172             | 1.37E-01 | 0.164             | 1.50E-01 |
| rs11613331            | 12          | 242301     | A               | G           | -0.047          | 6.06E-01          | -0.083   | 4.51E-01                         | -0.003   | 9.87E-01                   | -0.053   | 5.80E-01          | -0.115   | 2.41E-01          |          |

**Abbreviations:** MCI : mild cognitive impairment; MRS : metabolic risk score.

Model 1: Adjusted for age, sex, center, genetic analysis groups, first 5 PCs of genetic data.

Model 2: Model 1 with further adjustment for APOE -ε4 and APOE -ε2 carrier status.

Supplementary Table 5: Estimated associations of wGRS with MCI in HCHS/SOL set B

| wGRS    | Effect estimate | SE   | P-value |
|---------|-----------------|------|---------|
| MCI-MRS | 0.59            | 1.19 | 0.62    |
| BAIBA   | 0.08            | 0.90 | 0.93    |

The effect sizes are the log-odds ratios estimated in logistic mixed models of a wGRS in association with MCI in HCHS/SOL set B (the set of individuals with genetic data, MCI status, and no metabolomics). SE is the standard error estimate of the effect estimate, and p-value is the corresponding p-value.

The MCI-MRS wGRS was constructed based on two *AGXT2* SNPs independently associated with the MCI-MRS in conditional analysis.

The BABIBA wGRS was constructed based on seven *AGXT2* SNPs independently associated with the BAIBA in repeated conditional analyses

Supplementary Table 6: Demographics, health, and lifestyle characteristics of the ARIC study population datasets

|                                | <b>African American</b> | <b>European</b> |
|--------------------------------|-------------------------|-----------------|
| <b>N</b>                       | 1,032                   | 3,775           |
| <b>SEX = M (%)</b>             | 323 (31.30%)            | 1653 (43.79%)   |
| <b>AGE (years) (mean (SD))</b> | 78.57 (5.15)            | 79.38(5.17)     |
| <b>Education years (%)</b>     |                         |                 |
| <12                            | 286(27.71%)             | 308 (8.16%)     |
| 12                             | 217 (21.03%)            | 1319 (34.94%)   |
| >12                            | 529 (51.26%)            | 2148 (56.90%)   |
| <b>BMI (kg/m2) (%)</b>         |                         |                 |
| Normal weight (< 25.0)         | 162 (15.70%)            | 1015 (26.89%)   |
| Overweight (25.0 – 30.0)       | 334 (32.36%)            | 1431 (37.91%)   |
| Obese (> 30)                   | 468 (45.35%)            | 1104 (29.25%)   |
| <b>Smoking (%)</b>             |                         |                 |
| Never                          | 376 (36.43%)            | 1310 (34.70%)   |
| Former                         | 391 (37.89%)            | 1831 (48.50%)   |
| Current                        | 66 (6.40%)              | 208 (5.51%)     |
| <b>APOE-ε4 carriers (%)</b>    | 378 (35.8%)             | 939 (23.9%)     |
| <b>MCI (%)</b>                 | 213 (20.6%)             | 268 (28.5%)     |

**Abbreviations:** ARIC: Atherosclerosis Risk In Communities; SD: standard deviation; BMI: body mass index; MCI: mild cognitive impairment.

Supplementary Table 7: Associations of the variants that were associated with MCI-MRS and BAIBA in HCHS/SOL set B with MCI in ARIC, stratified by APOE-ε4 carrier status.

| Previous GWAS Outcome | Variant     | Chromosome | Position (hg38) | Eff. allele | Non eff. allele | Effective allele frequency in ARIC |                   | African American |           |                              |           |                          |           | European American |           |                                |           |                          |           |
|-----------------------|-------------|------------|-----------------|-------------|-----------------|------------------------------------|-------------------|------------------|-----------|------------------------------|-----------|--------------------------|-----------|-------------------|-----------|--------------------------------|-----------|--------------------------|-----------|
|                       |             |            |                 |             |                 | African Americans                  | European American | Total (n=1,032)  |           | APOE-ε4 non Carriers (n=654) |           | APOE-ε4 Carriers (n=378) |           | Total (n=3,775)   |           | APOE-ε4 non Carriers (n=2,836) |           | APOE-ε4 Carriers (n=939) |           |
|                       |             |            |                 |             |                 |                                    |                   | Beta             | P-value   | Beta                         | P-value   | Beta                     | P-value   | Beta              | P-value   | Beta                           | P-value   | Beta                     | P-value   |
| MRS                   | rs37371     | 5          | 35040125        | G           | A               | 0.980                              | 0.909             | -0.607           | 7.416E-02 | -0.330                       | 4.994E-01 | -0.880                   | 8.130E-02 | 0.060             | 5.154E-01 | -0.063                         | 5.618E-01 | 0.477                    | 1.674E-02 |
|                       | rs344515    | 5          | 35025665        | A           | G               | 0.638                              | 0.599             | 0.041            | 7.193E-01 | 0.124                        | 4.200E-01 | -0.034                   | 8.417E-01 | 0.023             | 6.689E-01 | 0.039                          | 5.412E-01 | 0.046                    | 6.537E-01 |
| BAIBA                 | rs16899972  | 5          | 34998673        | A           | C               | 0.330                              | 0.518             | 0.269            | 2.009E-02 | 0.164                        | 2.791E-01 | 0.451                    | 1.610E-02 | 0.047             | 3.745E-01 | 0.007                          | 9.131E-01 | 0.168                    | 1.035E-01 |
|                       | rs183958240 | 5          | 35002671        | G           | A               | 0.001                              | 0.000             | -12.168          | 9.744E-01 | -12.061                      | 9.820E-01 | -13.286                  | 9.880E-01 | -11.431           | 9.603E-01 | -11.255                        | 9.724E-01 | -12.677                  | 9.811E-01 |
|                       | rs13174311  | 5          | 35032240        | T           | C               | 0.116                              | 0.342             | -0.088           | 6.134E-01 | -0.149                       | 5.127E-01 | -0.029                   | 9.171E-01 | -0.028            | 6.089E-01 | -0.034                         | 6.124E-01 | -0.083                   | 4.401E-01 |
|                       | rs180749    | 5          | 35033500        | A           | G               | 0.817                              | 0.999             | 0.062            | 6.669E-01 | 0.246                        | 2.264E-01 | -0.117                   | 5.805E-01 | 0.149             | 8.528E-01 | 0.449                          | 6.824E-01 | -0.209                   | 8.656E-01 |
|                       | rs37369     | 5          | 35037010        | T           | C               | 0.551                              | 0.079             | 0.254            | 2.316E-02 | 0.253                        | 7.976E-02 | 0.258                    | 1.553E-01 | 0.061             | 5.228E-01 | 0.192                          | 8.472E-02 | -0.298                   | 1.367E-01 |
|                       | rs140156063 | 5          | 35037031        | A           | G               | 0.024                              | 0.000             | -0.027           | 9.412E-01 | 0.020                        | 9.667E-01 | -0.109                   | 8.534E-01 |                   |           |                                |           |                          |           |
|                       | rs37370     | 5          | 35039381        | T           | C               | 0.980                              | 0.909             | -0.607           | 7.416E-02 | -0.330                       | 4.994E-01 | -0.880                   | 8.130E-02 | 0.060             | 5.154E-01 | -0.063                         | 5.618E-01 | 0.477                    | 1.674E-02 |
|                       | rs11613331  | 12         | 242301          | A           | G               | 0.278                              | 0.543             | 0.110            | 3.628E-01 | 0.121                        | 4.422E-01 | 0.086                    | 6.649E-01 | 0.097             | 6.821E-02 | 0.090                          | 1.561E-01 | 0.161                    | 1.294E-01 |

Supplementary Table 8: Replication meta-analysis results for the genetic variants detected as associated with MCI-MRS and BAIBA in HCHS/SOL set B, stratified by *APOE*- $\epsilon$ 4 carrier status.

| SNP         | Total datasets |       |       |          |   |           |       |          |                  | <i>APOE</i> - $\epsilon$ 4 non Carriers |        |       |       |          |   |           |       |          | <i>APOE</i> - $\epsilon$ 4 Carriers |         |        |       |       |          |   |           |       |          |                  |         |
|-------------|----------------|-------|-------|----------|---|-----------|-------|----------|------------------|-----------------------------------------|--------|-------|-------|----------|---|-----------|-------|----------|-------------------------------------|---------|--------|-------|-------|----------|---|-----------|-------|----------|------------------|---------|
|             | Beta           | SE    | Z     | P-value  | Z | direction | Q     | pval.Q   | Number of strata | N total                                 | Beta   | SE    | Z     | P-value  | Z | direction | Q     | pval.Q   | Number of strata                    | N total | Beta   | SE    | Z     | P-value  | Z | direction | Q     | pval.Q   | Number of strata | N total |
| rs37371     | 0.069          | 0.068 | 1.01  | 3.12E-01 |   | ++        | 4.510 | 1.05E-01 | 3                | 7,956                                   | 0.062  | 0.083 | 0.74  | 4.59E-01 |   | ---       | 4.641 | 9.82E-02 | 3                                   | 5,659   | 0.135  | 0.148 | 0.91  | 3.64E-01 |   | ---       | 8.301 | 1.58E-02 | 3                | 1,952   |
| rs344515    | 0.033          | 0.043 | 0.77  | 4.42E-01 |   | +++       | 0.110 | 9.47E-01 | 3                | 7,956                                   | 0.047  | 0.053 | 0.90  | 3.69E-01 |   | +++       | 0.287 | 8.66E-01 | 3                                   | 5,659   | 0.057  | 0.082 | 0.70  | 4.85E-01 |   | +++       | 1.027 | 5.99E-01 | 3                | 1,952   |
| rs16899972  | 0.110          | 0.042 | 2.62  | 8.71E-03 |   | +++       | 4.079 | 1.30E-01 | 3                | 7,956                                   | 0.050  | 0.051 | 0.97  | 3.31E-01 |   | +++       | 1.332 | 5.14E-01 | 3                                   | 5,659   | 0.278  | 0.081 | 3.41  | 6.49E-04 |   | +++       | 3.043 | 2.18E-01 | 3                | 1,952   |
| rs183958240 | 0.202          | 0.445 | 0.45  | 6.50E-01 |   | +-        | 0.004 | 9.98E-01 | 3                | 7,956                                   | 0.173  | 0.592 | 0.29  | 7.70E-01 |   | +-        | 0.002 | 9.99E-01 | 3                                   | 5,659   | 0.338  | 1.294 | 0.26  | 7.94E-01 |   | +-        | 0.001 | 1.00E+00 | 3                | 1,952   |
| rs13174311  | -0.074         | 0.047 | -1.58 | 1.14E-01 |   | ---       | 3.030 | 2.20E-01 | 3                | 7,956                                   | -0.085 | 0.057 | -1.48 | 1.38E-01 |   | ---       | 2.288 | 3.19E-01 | 3                                   | 5,659   | -0.121 | 0.092 | -1.31 | 1.89E-01 |   | ---       | 1.285 | 5.26E-01 | 3                | 1,952   |
| rs180749    | -0.062         | 0.114 | -0.54 | 5.87E-01 |   | ++        | 2.253 | 3.24E-01 | 3                | 7,956                                   | -0.019 | 0.153 | -0.12 | 9.01E-01 |   | ++        | 4.511 | 1.05E-01 | 3                                   | 5,659   | -0.144 | 0.189 | -0.76 | 4.45E-01 |   | ---       | 0.089 | 9.56E-01 | 3                | 1,952   |
| rs37369     | 0.143          | 0.058 | 2.46  | 1.40E-02 |   | +++       | 1.722 | 4.23E-01 | 3                | 7,956                                   | 0.171  | 0.071 | 2.41  | 1.61E-02 |   | +++       | 0.810 | 6.67E-01 | 3                                   | 5,659   | 0.051  | 0.115 | 0.45  | 6.54E-01 |   | ++        | 4.622 | 9.92E-02 | 3                | 1,952   |
| rs140156063 | 0.441          | 0.312 | 1.41  | 1.58E-01 |   | +?        | 6.153 | 1.31E-02 | 2                | 4,181                                   | 0.629  | 0.403 | 1.56  | 1.19E-01 |   | ++?       | 5.210 | 2.25E-02 | 2                                   | 2,823   | 0.201  | 0.525 | 0.38  | 7.02E-01 |   | +?        | 1.360 | 2.43E-01 | 2                | 1,013   |
| rs37370     | 0.070          | 0.068 | 1.02  | 3.08E-01 |   | ++        | 4.536 | 1.04E-01 | 3                | 7,956                                   | 0.063  | 0.083 | 0.76  | 4.49E-01 |   | +-        | 4.691 | 9.58E-02 | 3                                   | 5,659   | 0.135  | 0.148 | 0.91  | 3.62E-01 |   | +-        | 8.285 | 1.59E-02 | 3                | 1,952   |
| rs11613331  | 0.067          | 0.043 | 1.55  | 1.21E-01 |   | ++        | 2.010 | 3.66E-01 | 3                | 7,956                                   | 0.055  | 0.052 | 1.06  | 2.90E-01 |   | ++        | 2.051 | 3.59E-01 | 3                                   | 5,659   | 0.114  | 0.083 | 1.37  | 1.71E-01 |   | ++        | 0.620 | 7.33E-01 | 3                | 1,952   |

Inverse-variance fixed-effects meta-analysis was used to meta-analyzed results from the three replication datasets: HCHS/SOL set C, and ARIC African and European Americans. Effect sizes and SEs were estimated based on the mixed-models analysis approach.

Supplementary Table 9: Association between lifestyle characteristics and MRS for MCI or BAIBA in HCHS/SOL (n=3978)

| Exposure                                                      | Outcome   | N     | Beta     | SE      | P-value  |
|---------------------------------------------------------------|-----------|-------|----------|---------|----------|
| Depression (10-item CES-D summary score)                      | MRS - MCI | 3,923 | 0.00016  | 0.00007 | 2.99E-02 |
| Education (Three levels:<12 yrs, 12 yrs, <12yrs)              |           | 3,962 | -0.00102 | 0.00049 | 3.82E-02 |
| Physical activity (Total physical activity (min/day))         |           | 3,954 | 0.00000  | 0.00000 | 1.07E-01 |
| Sleep Duration (Average sleep duration (hours))               |           | 3,768 | -0.00006 | 0.00032 | 8.47E-01 |
| Insomnia (8 Womens's Health Initiative Insomnia Rating Scale) |           | 3,863 | 0.00009  | 0.00007 | 2.34E-01 |
| Respratory event index (Apnea/Hypopnea Index (3% desat) )     |           | 3,525 | 0.00006  | 0.00004 | 1.54E-01 |
| BMI (kg/m <sup>2</sup> )                                      |           | 3,954 | -0.00007 | 0.00009 | 4.54E-01 |
| Smoking (Three levels: Never, Former,Current)                 |           | 3,965 | -0.00037 | 0.00065 | 5.71E-01 |
| Drinking (Three levels: Never, Former,Current)                |           | 3,967 | -0.00080 | 0.00068 | 2.37E-01 |
| Mediterranean diet score                                      |           | 3,968 | -0.00014 | 0.00031 | 6.53E-01 |
| Depression (10-item CES-D summary score)                      | BAIBA     | 3,923 | -0.00357 | 0.00324 | 2.71E-01 |
| Education (Three levels:<12 yrs, 12 yrs, <12yrs)              |           | 3,962 | -0.01137 | 0.02446 | 6.42E-01 |
| Physical activity (Total physical activity (min/day))         |           | 3,954 | 0.00001  | 0.00002 | 6.11E-01 |
| Sleep Duration (Average sleep duration (hours))               |           | 3,768 | 0.02191  | 0.01556 | 1.60E-01 |
| Insomnia (8 Womens's Health Initiative Insomnia Rating Scale) |           | 3,863 | -0.00044 | 0.00372 | 9.05E-01 |
| Respratory event index (Apnea/Hypopnea Index (3% desat) )     |           | 3,525 | -0.00475 | 0.00174 | 6.65E-03 |
| BMI (kg/m <sup>2</sup> )                                      |           | 3,954 | -0.00892 | 0.00334 | 7.72E-03 |
| Smoking (Three levels: Never, Former,Current)                 |           | 3,965 | 0.03884  | 0.02542 | 1.27E-01 |
| Drinking (Three levels: Never, Former,Current)                |           | 3,967 | 0.02759  | 0.02880 | 3.38E-01 |
| Mediterranean diet score                                      |           | 3,978 | -0.00502 | 0.01491 | 7.36E-01 |

## Supplementary Figures

Supplementary Figure 1: QQ-plots of GWAS for MCI-MRS and BAIBA in HCHS/SOL (n=3,862).

(a) QQ-plot of the MCI-MRS GWAS

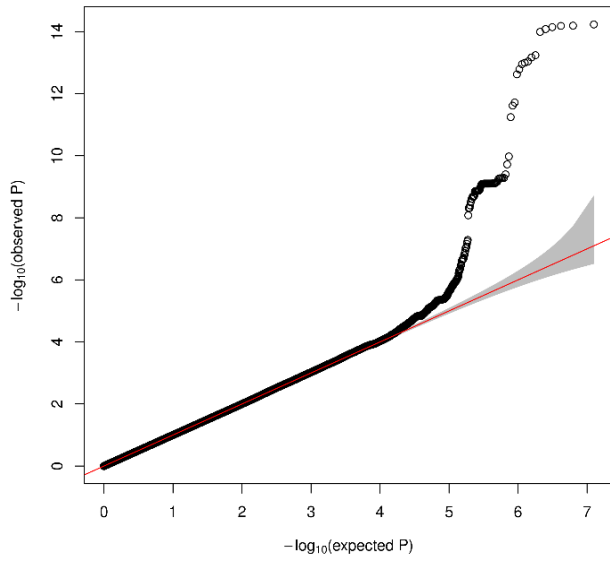

(b) QQ-plot of the BAIBA GWAS

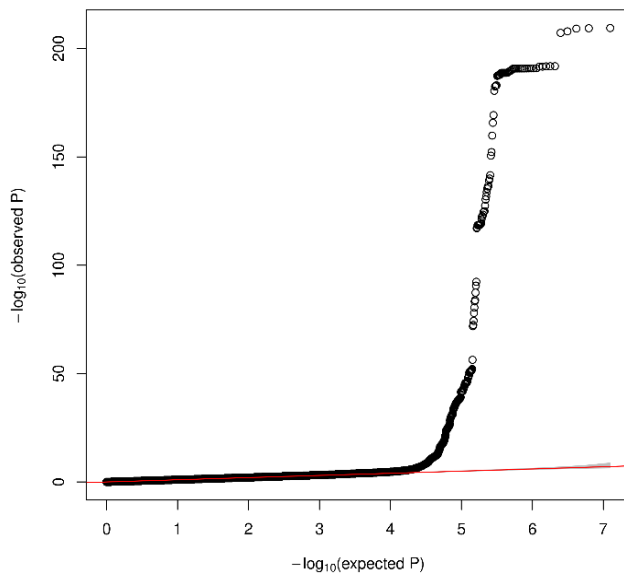

Supplementary Figure 2: Locus zoom plot for the top locus, chr5p13.2, associated with BAIBA in n=3,862 HCHS/SOL participants.

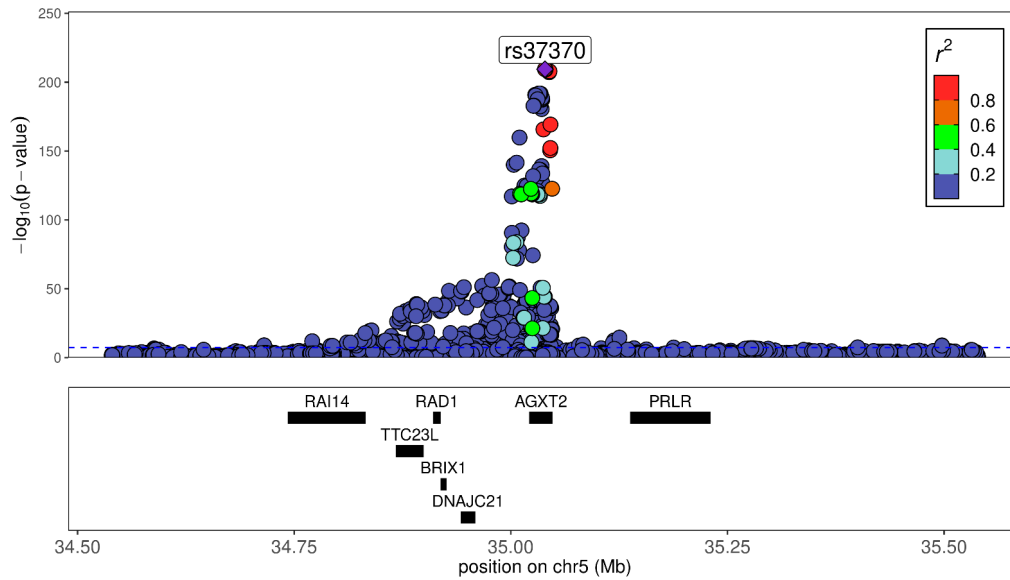

The purple diamond is the most statistically significant SNP in the region, rs37370. All other SNPs are shown as circles, in colors that represent the degree of linkage disequilibrium with the index SNP ( $R^2$  values).



## Supplementary References

1. Wright, J.D., Folsom, A.R., Coresh, J., Sharrett, A.R., Couper, D., Wagenknecht, L.E., Mosley, T.H., Ballantyne, C.M., Boerwinkle, E.A., Rosamond, W.D., et al. (2021). The ARIC (Atherosclerosis Risk In Communities) Study: JACC Focus Seminar 3/8. *J. Am. Coll. Cardiol.* 77, 2939–2959.
2. Knopman, D.S., Gottesman, R.F., Sharrett, A.R., Wruck, L.M., Windham, B.G., Coker, L., Schneider, A.L.C., Hengrui, S., Alonso, A., Coresh, J., et al. (2016). Mild cognitive impairment and dementia prevalence: The Atherosclerosis Risk in Communities Neurocognitive Study. *Alzheimer's Dement. Diagnosis, Assess. Dis. Monit.* 2, 1–11.
3. Fung, T., Hu, F., Mccullough, M., Newby, P.K., Willett, W.C., and Holmes, M.D. (2006). Diet Quality Is Associated with the Risk of Estrogen Receptor-Negative Breast Cancer in Postmenopausal Women 1. *Nutr. Epidemiol.* 136, 466–472.
